# Supplementary material for: Beta-HPV 5 and 8 E6 Promote p300 Degradation by Blocking AKT/p300 Association
Source: PLoS Pathog. 2011 Aug 25;7(8):e1002211. doi: 10.1371/journal.ppat.1002211 (PMC3161984; doi:10.1371/journal.ppat.1002211)
Supplement: Table S1 — Proteins identified as potential E6-interactors via mass-spec. Values represent unique peptides mapping to each protein in each run. Proteins were identified as a potential candidate based on the following filters: DiffScore> = 0.1, Ion percent> = 0.3, and at least 2 unique peptides for a given protein. (XLSX) [file ppat.1002211.s003.xlsx]

## Sheet: Sheet2
Protein	5 E6	8 E6	38 E6	16 E6	Count	Size	Description
CAPZA1	2	6	5	6	4	32kD	F-actin capping protein alpha-1 subunit
CBR1	5	3	5	4	4	30kD	Carbonyl reductase [NADPH] 1: Catalyzes a wide variety of carbonyl compounds including the antitumo anthracycline antibiotics. Can convert prostaglandin E2 to prostaglandin F2-alpha
GRPEL1	6	8	6	7	4	24kD	GrpE protein homolog 1, mitochondrial precursor: Essential component of the PAM complex, a complex required for the translocation of transit peptide-containing proteins from the inner membrane into the mitochondrial matrix in an ATP dependent manner
LOH12CR1	2	2	2	2	4	22kD	unknown
Q5U0D9_HUMAN	5	4	7	3	4	28kD	Tropomyosin: binds to actin filaments
Q8IZ71_HUMAN	2	3	2	5	4	38kD	GNAI2 (guanine nucleotide-binding protein G(I), alpha 2): involved in the hormonal regulation of adenylate cyclase
STOM	2	4	2	3	4	31kD	stomatin: thought to regulate cation conductance. May regulate ACCN! And ACCN3 gating
YWHAZ	3	5	4	5	4	27kD	14-3-3 protein zeta/delta: adapter protein implicated in the regulation of signaling pathways.
ATP5B	7	5	5	9	4	56kD	ATP synthase subunit beta, mitochondrial precursor: produces ATP from ADP in the presence of a proton gradient across the membrane
CORO1C	5	8	3	8	4	53kD	Coronin-1C: may be involved in cytokinesis, motility and signal transduciton
EEF1G	12	5	7	10	4	49kD	Elongation factor 1-gamma: probably plays a role in anchoring the complex to other cellular components
P4HB	6	4	2	7	4	57kD	Protein disulfide-isomerase preursor: catalyzes the formation, breakage and rearrangement of disulfide bonds.
PDIA3	4	2	3	8	4	56kD	Protein disulfide-isomerase A3 precursor
Q53XX6_HUMAN	5	4	3	6	4	59kD	ATP 5A1: ATP synthase, H+ transporting, mitochondrial F1 complex, alpha subunit, isoform 1
Q6ZSH5_HUMAN	7	3	2	5	4	53kD	PDIA6 (protein disulfide isomerase 6)
VIM	19	12	11	17	4	53kD	Vimentin: class-III intermediate filaments found in variuos non-epithelial cells, especially mesenchymal cells
ACTN4	18	13	8	6	4	104kD	Alpha-actinin-4: F-actin cross linkning protein which is thought to anchor actin to a variety of intracellular structures
CKAP4	10	7	4	5	4	66kD	Cytoskeleton-associated protein 4
CTNNA1	7	5	3	5	4	100kD	Catenin alpha-1: associates with the cytoplasmic domain of a variety of cadherins
DBN1	6	8	3	7	4	71kD	Drebrin
gi|14141152|heterogeneous_nuc	12	4	4	2	4	77kD	heterogeneous nuclear ribonucleoprotein M, isoform a
HADHA	6	4	2	3	4	83kD	Trifunctional enzyme subunit alpha, mitochondrial precursor
IPI:IPI00329745.4|UniProt/Swiss-Prot:P42704|REFSEQ	5	3	2	3	4	158kD	leucine rich PPR motif containing protein
LAD1	11	8	4	5	4	57kD	Ladinin1: anchoring filament protein which is a component of the basement membrane zone. May contribute to the stability of the association of the epithelial layers with the underlying mesenchyme. Could maintain dermal-epidermal cohesion
LAMB3	21	18	8	13	4	129kD	Laminin beta-3 chain precursor
LAMC2	13	10	8	10	4	130kD	Laminin gamma-2 chain precursor
LIMA1	17	12	3	8	4	85kD	LIM domain and actin-binding protein 1: Binds to actin monomers and filaments
MYO1B	17	13	9	9	4	131kD	Myosin Ib
Q6ZS99_HUMAN	6	9	3	5	4	65kD	similar to nucleolin
SLC3A2	8	3	3	2	4	57kD	solute carrier family 3, member 2: involved in normal and neoplastic growth
THBS1	11	8	6	5	4	129kD	Thrombospondin-1 precursor: Adhesive glycoprotein that mediates cell-cell and cell-matrix interactions
TRIM29	3	5	6	2	4	65kD	Tripartite motif protein 29
VCP	3	3	3	3	4	89kD	Transitional ER ATPase
FLNA	31	13	9	27	4	280kD	Filamin A, alpha: promotes orthogonal branching of actin filaments and links actin filaments to membrane glycoproteins
IPI00377045	15	6	3	12	4	372kD	LamA3 (epiligrin alpha 3 subunit): cell adhesion
IQGAP1	7	4	3	6	4	189kD	Ras GTPase activating like protein IQGAP1: binds to activated CDC42 but does not stimulate its GTPase activity. It associates with calmodulin. Could serve as an assembly scaffold for the organization of a multimolecular complex that would interface incoming signals to the reorganization of the actin cytoskeleton at the plasma membrane.
ITGB4	4	2	2	8	4	202kD	Integrin beta 4-precursor: receptor for laminin. Plays a critical structural role in the hemidesmosomes of epithelial cells
PRKDC	12	5	9	24	4	469kD	DNA-dependent protein kinase catalytic subunit: serine threonine protein kinase that acts as a molecular sensor for DNA damage
Q6S376_HUMAN	106	82	51	136	4	516kD	Plectin 11: involved in cytoskeleton-membrane attachment in epithelial cells
SPTAN1	44	28	7	38	4	284kD	Spectrin alpha chain, brain: interacts with calmodulin in a calcium dependent manner and is thus candidate for the calcium dependent movement of the cytoskeleton at the membrane
SPTBN1	33	23	6	30	4	274kD	Spectrin beta chain, brain 1: see above
C1QBP		2	2	6	3	31kD	Complement component 1 Q subcomponent-binding protein, mitochondrial precursor: not known. Binds to the globular heads of C1Q thus inhibiting C1 activation
EMD		4	2	2	3	28kD	emerin: found in nuclear envelope
gi|13124696|sp|P47756|CAPB_HUMAN		6	3	4	3	31kD	CAPZB: F-actin capping protein beta subunit
IPI00016339		2	3	2	3	31kD	Ras-related protein Rab-5C: involved in protein transport
MDH2		3	5	3	3	35kD	malate dehydrogenase, mitochondrial precursor
PHB		3	3	3	3	29kD	prohibitin: inhibits DNA synthesis. Has a role in regulating proliferation. May play a role in regulating mitochondrial respiration activity and in aging
RAB7		5	4	2	3	23kD	Ras-related protein Rab-7: involved in late endocytic transport. Contributes to maturation of phagosomes (acidification)
SLC25A5		3	4	3	3	32kD	Sollute carrier family 25, member 5: ADP/ATP translocase, catalyzes the exchange of ADP and ATP across the mitochondrial inner membrane
HIST2H2BE	5		2	2	3	13kD	Histone H2B type 2-E: core component of nucleosome
gi|16307090|AAH09623_(BC00962	3	8		5	3	29kD	similar to nucleophosmin
ILF2	3		4	2	3	43kD	Interleukin enhancer-binding factor 2: Appears to function predominantly as a heterodimeric complex with ILF3. May regulate the tx of the IL2 gene during T-cell activation
Q53FT5_HUMAN	2		2	4	3	47kD	Proteasome 26S non-ATPase subunit 11 variant
SQRDL	2		5	3	3	49kD	Sulfide:quinone oxidoreductase, mitochondrial precursor: catalyzes the reduction of hydrogen sulfide into sulfite and water
TUBB	4		5	5	3	49kD	Tubulin, beta polypeptide
TUFM	2		2	2	3	49kD	Elongation factor Tu, mitochondrial precursor: promotes the GTP dependent binding of aminoacyl tRNA to the A site of ribosomes
ACTA2	2	2	2		3	42kD	Acta A2 protein: Actin family
EIF4A1	2	2		4	3	46kD	Eukaryotic initiation factor 4A-I: ATP-dependent RNA helicase which is a subunit of the eIF4F complex involved in cap recognition and is required for mRNA binding to ribosome
IPI00166768	3	3		4	3	37kD	TUBA6 protein
DKFZp686B16177	5	2	3		3	68kD	ribophorin 1: essential subunit of N-oligosaccharyl transferase enzyme
gi|4502285|ref|NP_001672.1|	4	6	3		3	109kD	ATPase, Ca++ transporting, cardiac muscle, slow twitch 2
HNRPU	3	2	3		3	90kD	heterogeneous nuclear ribonucleoprotein U
IPI00395737	17	4	3		3	120kD	Leucine zipper protein 1
PKP3	3	4	6		3	87kD	Plakophilin-3
TRIM28	2	2	2		3	88kD	Transcription intermediary factor 1-beta
TRMT1	6	4	3		3	72kD	N(2),N(2)-dimethylguanosine tRNA methyltransferase
CALD1		5	2	3	3	93kD	Caldesmon: actin and myosin binding protein implicated in the regulation of actomyosin interactions in smooth muscle and nonmuscle cells
IPI00013508	9	6		11	3	107kD	actinin alpha 1
IPI00166518	14	4		2	3	118kD	Myosin phosphatase Rho interacting protein isoform 1
IPI00177366	3	2		2	3	92kD	unknown
IPI00293464	3	4		2	3	127kD	DDB1(DNA damage binding protein 1)
MYO1D	4	4		4	3	116kD	Myosin Id
NT5E	2	2		3	3	63kD	5'-nucleotidase, ecto
PARP1	3	2		2	3	112kD	Poly [ADP-ribose] polymerase 1
Q2I204_HUMAN	6	6		3	3	111kD	HYOU1(hypoxia upregulated 1) Has a pivital role in cytoprotective cellular mechanisms triggered by oxygen deprivation
RAI14	7	3		2	3	110kD	Retinoic acid induced 14
SFPQ	8	3		2	3	76kD	Splicing factor proline/glutamine rich
XRCC5	2	4		2	3	82kD	Ku80 (X-ray complementing defective repair in chinese hamster cells 5)
DDX21	6		2	2	3	87kD	DEAD box polypeptide 21: can unwind ds RNA and can fold or introduce a secondary structure to a ss RNA. Functions as cofactor for c-Jun activated transcription
LGALS3BP	3		2	2	3	65kD	Galectin-3-binding protein precirsor: promotes integrin mediated cell-adhesion. May stimulate host defense against viruses and tumor cells
FLNB	34	27	8		3	278kD	Filamin B: connects cell membrane constituents to the actin cytoskeleton
IPI00017030	6		2	5	3	233kD	Splice isoform 1 of myosin XVIIIA: myosin containing a PDZ domain. May be involved in the maintenance of the stromal cell architectures required for cell to cell contact. Interacts with JAK3 and actin
AHNAK	6	3		7	3	312kD	Neuroblast differentiation associated protein AHNAK: may be required for neuronal cell differentiation
AIM1	11	4		9	3	188kD	Absent in melanoma 1 protein: may function as a suppressor of malignant melanoma. May exert its effects through interactions with the cytoskeleton
COL17A1	2	4		2	3	150kD	Collagen alpha 1 (XVII) chain
FER1L3	7	2		6	3	234kD	Myoferlin: may play a role in membrane regeneration and repair
MYH10	11	6		13	3	228kD	Myosin-10: cellular myosin that appears to play a role in cytokinesis, cell shape, and specialized functions such as secretion and capping
EEF1B2		2	3		2	24kD	Elongation factor 1-beta: stimulates the exchange of GDP bound to EF-1 alpha to GTP
gi|14043070|heterogeneous_nuc		3	3		2	38kD	heterogeneous nuclear ribonucleoprotein A1, isoform b
HADH2		3	3		2	26kD	hydroxyacyl-coenzyme A dehydrogenase, Type II
PIP		2	3		2	16kD	Prolactin-inducible protein precursor
PPIB		2	4		2	22kD	Peptidyl-prolyl cis-trans isomerase B precursor
HIST1H2AB	3		2		2	14kD	Histone H2A type 1-B: core component of nucleosome
EEF1D			2	2	2	30kD	Elongation factor 1-delta: stimulates the exchange of GDP to GTP
ETFA			2	2	2	35kD	Electron-transfer-flavoprotein, alpha polypeptide: transfers electrons to the main mitochondrial respiratory chain via ETF-ubiquinone oxidoreductase
HNRPA2B1			2	2	2	37kD	Heterogeneous nuclear ribonucleoproteins A2/B1: involved with pre-mRNA processing
PSMA7			2	3	2	27kD	Proteasome subunit alpha type 7
ARPC2		2		2	2	34kD	actin related protein 2/3 complex, subunit 2: part of a complex implicated in the control of actin polymerization in cells
ATP5O		2		2	2	23kD	ATP synthase O subunit, mitochondrial precursor: seems to be part of the stalk that links CF(0) to CF(1). It either transmits conformational changes or is implicated in proton conduction
IPI00178083		6		5	2	29kD	unknown
TPM1		3		2	2	32kD	Tropomyosin 1 alpha chain
LDHA	2			3	2	36kD	lactate dehydrogenase A
PSMA2	2			2	2	25kD	Proteasome subunit alpha type 2: May have a potential regulatory effect on another component of the proteasome through tyrosine phosphorylation
ALDH3A2	3			2	2	54kD	ALDH3A2 protein: Catalyzes the oxidation of long-chain aliphatic aldehydes to fatty acids
DAPK3	3			3	2	52kD	Death-associated protein kinase 3: Serine/threonin kinase which acts as a positive regulator of apoptosis. Phosphorylates histone H3 on Thr11 at centromeres during mitosis
DARS	2			2	2	57kD	Aspartyl-tRNA synthetase, cytoplasmic
DLST	3			3	2	48kD	Dihydrolpoyllysine-residue succinyltransferase component of 2-oxoglutarate dehydrogenase complex, mitochondrial precursor:
IPI:IPI00455628.1|REFSEQ_XP:XP_496711	4			4	2	51kD	similar to elongation factor 1 alpha
IPI00032140	3			5	2	45kD	serine (or cysteine proteinase inhibitor
IPI00302925	2			4	2	59kD	Chaperonin containing TCP1, subunit 8
NONO	5			5	2	54kD	Non-POU domain containing octamer-binding protein: DNA and RNA binding protein involved in several nuclear processes. Involved in pre-mRNA slicing. Involved in tx regulation
PTRF	3			3	2	43kD	Polymerase I and transcript release factor
RUVBL1	2			2	2	50kD	RuvB-like 1: possesses single-stranded DNA-stimulated ATPase and ATP-dependent DNA helicase activity. Component of NuA4 histone acetyltransferase complex which is involved in transcriptional activation by acetylation of nucleosomal histone H4 and H2A. Also plays an essential role in oncogenic transformation by MYC
gi|16554039|unnamed_protein_p	2	2			2	64kD	unknown
HNRPK	2	2			2	50kD	Heterogeneous nuclear ribonucleoprotein K: one of the major pre-mRNA binding proteins
DDOST			2	3	2	50kD	Dolichyl-diphophooligosaccharide protein glycosyltransferase: essential subunit of N-oligosaccharyl transferase enzyme which catalyzes the transfer of a high mannose oligosaccharide to an asparagin residue withing an Asn-X-Ser/Thr consensus motif
IPI:IPI00411506.1|ENSEMBL:ENSP00000341297			4	3	2	48kD	unknown
GSDM1		3	2		2	49kD	Gasdermin
Q53YB5_HUMAN		6	2		2	44kD	SERPINB3 (serine of cysteine proteinase inhibitor clade B, member 3): may act as a protease inhibitor to modulate the host immune response against tumor cells
SERPINH1		3	2		2	46kD	binds specifically to collagen. Could be involved as a chaperone in biosynthetic pathway of collagen. Induced by heat shock
BLMH		3		2	2	52kD	Bleomycin hydrolase: catalyzes the inactivation of the antitumor drug BLM (a glycopeptide)
CALR		2		2	2	48KD	calreticulin: molecular calcium binding chaperone promoting folding, oligomeric assembly and quality control in the ER via the calreticulin/calnexin cycle.
GDI2		2		2	2	50kD	GDP dissociation inhibitor 2: regulates the GDP/GTP exchange reaction of most Rab proteins by inhibiting the dissociation of GDP from them, and the subsequent binding of GTP to them
HAL		4	2		2	72kD	Histidine ammonia-lyase
MYO1C		15	8		2	118kD	Myosin Ic: actin based moto
C19orf21	2	2			2	75kD	chromosome 19 open reading frame 21
CANX	2	2			2	67kD	Calnexin precursor: calcium binding protein that interacts with newly synthesized glycoproteins in the ER
CTTN	4	5			2	61kD	cortactin: may contribute to the organization of cell structure. The SH3 motif may function as a binding region to the cytoskeleton.
G22P1	2	5			2	69kD	Ku70 (X-ray repair complementing defective repair in chinese hamster cells 6): single stranded DNA dependent ATP dependent helicase. Involved in stabilizing broken DNA ends.
gi|3152835|p120_catenin_isofo	3	2			2	107kD	p120 catenin isoform 1AB
OGDH	2	2			2	115kD	Oxoglutarate (alpha-ketoglutarate) dehydrogenase
PPP1R12A	4	2			2	115kD	Protein phosphatase 1 regulatory subunit 12A
ATP1A1	3		2		2	112kD	Sodium/potassium transporting ATPase alpha 1 chain precursor: catalytic component of the active enzyme that catalyzes the hydrolysis of ATP, coupled with the exchange of sodium and potassium ions across the plasma membrane
DDX17	3		2		2	72kD	DEAD box polypeptide 17: RNA dependent ATPase activity
gi|4503297|DEAD/H_(Asp-Glu-Al	4		4		2	142kD	DDX9 (DEAD/H box polypeptide 9, isoform 1
LMNA	5		3		2	74kD	Lamin A/C: component of the nuclear lamina
PABPC1	3		2		2	70kD	Polyadenylate binding protein 1: binds the poly A tail of mRNA. May be involved in cytoplasmic regulatory processes of mRNA metabolism
XRN2	4		4		2	108kD	5'-3' exoribonuclease
FAM62A	5			2	2	122kD	unknown
gi|38524618|ref|NP_443137.1|	4			3	2	124kD	formin-like 2: actin binding, transcription factor activity
GTF2I	2			2	2	112kD	general transcription factor II, I: interacts with the basal transcription machinery by coordinating the formation of a multiprotein complex at the C-FOS promoter, and linking specific signal responsive activator complexes.
HSD17B4	2			2	2	79kD	Peroxisomal multifunctional enzyme type 2: Bifunctional enzyme acting on the peroxisomal beta oxidation pathway for fatty acids
IPI00012268	2			2	2	108kD	26S proteasome non-ATPase regulatory subunit 2
MX2	2			2	2	82kD	myxovirus resistance 2: interferon induced GTP-binding protein
MYO1C	16			3	2	118kD	myosin 1C: myosins are actin-based motor molecules with ATPase activity. Serve in intracellular movements
MYO1E	4			3	2	127kD	myosin 1E: see above
SYNCRIP	3			2	2	69kD	synaptotagmin binding, cytoplasmic RNA interacting protein: heterogeneous nuclear ribonucleoprotein implicated in mRNA processing mechanisms
EP300	12	9			2	264kD	E1A-associated protein p300: functions as a histone acetyltransferase and regulates transcription via chromatin remodeling. Binds to and may be involved in the transforming capacity of the adenovirus E1A protein
EVPL		3		4	2	231kD	Envoplakin: component of the cornified envelope of keratinocytes. May link the cornified envelope to desmosomes and intermediate filaments
EPPK1	3			2	2	553kD	Epiplakin: belongs to the plakin or cytolinker family
FASN	3			3	2	273kD	Fatty acid synthase: catalyzes the formation of long-chain fatty acids
gi|2947318|supervillin	5			6	2	200kD	SVIL: a novl membrane-associated, F-actin binding protein in the villin/gelsolin superfamily
IPI00024067	7			5	2	192kD	clatherin heavy chain 1
IPI00215743	3			3	2	152kD	splice isoform of ribosome binding protein 1
ITPR3	2			4	2	304kD	Inositol 1,4,5-triphosphate receptor type 3
MACF1	3			4	2	620kD	Microtubule-actin cross-linking factor 1, isoforms 1/2/3/5: F-actin binding protein which may play a role in cross-linking actin to other cytoskeletal proteins
MYO1B	3			2	2	131kD	Myosin Ib: motor protein that may participate in process critical to neuronal development and function such as cell migration, neurite outgrowth and vesicular transport
MYO5A	2			3	2	215kD	Myosin-5A: processive actin based motor involved in melanosome transport
SPTBN2	2			2	2	271kD	Spectrin beta chain, brain 2: probably plays an important role in neuronal membrane skeleton
ARPC3			2		1	20kD	Actin related protein 2/3 complex subunit 3: part of a complex implicated in the control of actin polymerization in cells
CHP			2		1	22kD	Calcium binding protein P22: required for constitutive membrane traffic. Inhibits GTPase-stimulated Na(+)/H(+) exchange. Also inhibits calcineurin phosphatase activity
LRRC59			2		1	34kD	Leucine rich repeat containing protein 59
PSMB1			2		1	26kD	proteasome subunit beta type 1 precursor
Q53XN6_HUMAN			2		1	36kD	ELAV1 (embryonic lethal, abnormal vision, drosophila): binds avidly to the AU rich element in FOS and IL3 mRNAs.
Q7Z3Y4_HUMAN			2		1	25kD	unknown
RAB11B			2		1	24kD	Ras related protein: possesses GTPase activity
RAB2			4		1	23kD	Ras related protein Rab-2A: required for protein transport from the ER to the golgi complex
SEC22L1			2		1	24kD	SEC22 vesicle trafficking protein homolog B: SNARE involved in ER/golgi membrane trafficking
SFRS3			3		1	19kD	Splicing factor, arginine/proline rich 3: may be involved in RNA processing in relation with cellular proliferation and/or maturation
ANXA5		2			1	35kD	Annexin A5
CAPZB		2			1	33kD	Capping protein )actin filament) muscle Z-line, beta
DECR1		2			1	36kD	2,4-dienoyl CoA reductase 1, mitochondrial
EFHD2		2			1	26kD	EF hand domain containing 2
GNAI3		2			1	40kD	Guanine nucleotide binding protein G(k) subunit alpha
HBA1		2			1	15kD	hemoglobin, alpha 1
IPI:IPI00455754.1|REFSEQ_XP:XP_496885;XP_499306		2			1	10kD	unknown
IPI00000477		2			1	23kD	PNAS-139: regulation of actin filament polymerization
LOC342897		2			1	30kD	similar to F-box only protein 2
PHB2		2			1	33kD	prohibitin 2: acts as a mediatof of transcriptional repression by nuclear hormone receptors via recruitment of histone deacetylases
PSMB6		2			1	25kD	proteasome subunit beta type
Q14473_HUMAN		4			1	18kD	Beta globin gene from a thalassemia patient
RAP1B		2			1	20kD	member of Ras oncogene family
TPM2		2			1	32kD	Tropomyosin 2
CALML5	3				1	15kD	Calmodulin-like protein 5: binds calcium. May be involved in terminal differentiation of keratinocytes
DKFZp686I0180	2				1	28kD	unknown. Belongs to the peptidase T1B family. Possible proteasome subunit?
IPI00042578	3				1	34kD	similar to heterogeneous nuclear ribonucleoprotein A1 isoform A
Q53HE2_HUMAN	5				1	26kD	Triosephosphate isomerase 1 variant
Q9BWA9_HUMAN	2				1	28kD	HNRPA2B1 protein (heterogeneous nuclear ribonucleoprotein A2/B1)
S100A11	2				1	11kD	S100 calcium binding protein A11
S100A8	3				1	10kD	S100 calcium binding protein A8: expressed by macrophages in chronic inflammations. Also expressed in epithelial cells constituitively or induced during dermatosis. May interact with components of the intermediate filaments
TPM1	3				1	28kD	Tropomyosin 1: binds to actin filaments
CALML3				2	1	16kD	Calmodulin-like protein 3: may be similar to that of authentic calmodulin and may actually compete wuth calmodulin by binding with different affinities to cellular substrates
CAPZA2				2	1	32kD	F-actin capping protein alpha-2 subunit
HIST4H4				2	1	11kD	Histone H4: core component of nucleosome
PSMA5				2	1	26kD	Proteasome subunit alpha type 5
PSMB3				3	1	22kD	Proteasome subunit beta type 3
Q2QD09_HUMAN				2	1	26kD	belongs to the triosephosphate isomerase family
ALDH7A1	2				1	55kD	Aldehyde dehydrogenase family 7 member A1: aldehyde dehydrogenase family
ENDOD1	2				1	55kD	Endonuclease domain-containing 1 protein precursor: may act as a Dnase and an Rnase
GLUD1	2				1	61kD	Glutamate dehydrogenase 1: may be involved in learning and memory reeactions
IPI:IPI00292901.2|UniProt/TrEMBL:Q9P2F4|REFSEQ_XP:	2				1	58kD	tRNA methyltransferase
Q7Z637_HUMAN	2				1	38kD	PTPN18 protein
Q8IUK7_HUMAN	6				1	45kD	ALB protein: albumin 2
EEF1A1			2		1	47kD	eukaryotic translation elongation factor 1 alpha 1: promotes the GTP dependent binding of animoacyl tRNA to the A-site of ribosomes during protein biosynthesis
ENO1B			2		1	49kD	alpha enolase: multifunctional enzyme that, as well as its role in glycolysis, plays a part in various proceses such as growth control, hypoxia tolerance and allergic responses. Binds the c-myc promoter and acts as a transcriptional repressor. May be a t
IPI00034283			2		1	60kD	similar to tubulin beta-5 chain
CORO2A				2	1	59kD	Coronin, actin binding protein, 2A
CS				2	1	51kD	Citrate synthase, mitochondrial precursor
DKFZp686P03159				4	1	40kD	unknown
FSCN1				2	1	54kD	Fascin homolog 1, actin bundling protein
gi|5031753|ref|NP_005511.1|				2	1	49kD	heterogeneous nuclear ribonucleoprotein H1
HADHB				3	1	51kD	Trifunctional enzyme beta subunit, mitochondrial precursor
IPI:IPI00179299.1|UniProt/Swiss-Prot:O43251-2				2	1	40kD	RNA binding protein 9
MPP6				5	1	61kD	MAGUK p55 subfamily member 6
PSMC2				2	1	48kD	26S protease regulatory subunit 7
PSMC3				2	1	49kD	Proteasome 26S subunit, ATPase 3
PSMC5				2	1	45kD	26S protease regulatory subunit 8
PSMD3				3	1	60kD	26S proteasome non-ATPase regulatory subunit 3
Q53FC4_HUMAN				2	1	46kD	Ubiquitous mitochondrial creatine kinase variant
Q53XL8_HUMAN				2	1	49kD	Proteasome 26S subunit, ATPase 1
SERPINB2				2	1	46kD	Plasminogen activator inhibitor 2 precursor: inhibits urokinase-type plasminogen activator
SHMT2				2	1	55kD	Serine hydroxymethyltransferase, mitochondrial precursor
SNTB2				4	1	57kD	Beta-2-syntrophin: has a PDZ domain. Adapter protein that binds to and probably organizes the subcellular localization of a variety of membrane proteins. May link various receptors to the actin cytoskeleton and the dystrophin glycoprotein complex. May play a role in the regulation of secretory granules via its interaction with PTPRN
ACTR3		2			1	47kD	ARP actin related protein homolog: part of a complex implicated in the control of actin polymerization
CORO1B		2			1	54kD	Coronin-1B: regulates leading edge dynamics and cell motility in fibroblasts. May be involved in cytokinesis and signal transduction
CPA4		3			1	47kD	Carboxypeoptidase A4 precursor: involved in the histone hyperacetylation pathway
ME1		2			1	64kD	NADP-dependent malic enzyme
PTBP1		2			1	57kD	Polypyrimidine tract-binding protein 1: plays a role in pre-mRNA splicing. Binds to the polypyrimidine tract of introns. May promote the binding of U2 snRNP to pre-mRNA
Q5VTE0_HUMAN		5			1	50kD	Eukaryotic translation elongation factor 1 alpha like 3
Q86YG0_HUMAN		6			1	47kD	ALB protein (albumin)
TUBB2C		2			1	49kD	Tubulin beta-2C chain
ATAD3A		11			1	66kD	ATPase family, AAA domain containing, 3A
COL17A1		3			1	150kD	Collagen alpha 1 (XVII) chain
ITGB1		3			1	88kD	integrin beta-1 precursor
POF1B		2			1	68kD	premature ovarian failure, 1B
UBAP2L		6			1	114kD	Ubiquitin associated protein 2 like
DSC3			2		1	100kD	Desmocollin-3 precursor: component of intercellular desmosome junctions.
gi|14773528|hypothetical_prot			3		1	109kD	glucosidase II alpha subunit
IDE			2		1	117kD	Insulin degrading enzyme: may play a role in the cellular processing of insulin
IPI:IPI00217561.1|UniProt/Swiss-Prot:P05556-3|REFS			2		1	91kD	Splice isoform beta-1c of integrin beta 1 precursor
IPI00106552			2		1	135kD	similar to Ischemia related factor NYW-1 homolog
IVL			4		1	68kD	Involucrin: part of the insoluble cornified cell envelope of stratified squamous epithelia
LCP1			2		1	70kD	L-plastin: actin binding protein
LTF			2		1	78kD	lactotransferrin precursor
NOL1			2		1	94kD	nucleolar protein 1: may play a role in the regulation of the cell cycle and the increased nuceolar activity that is associated with cell proliferation
PPP1R13L			7		1	89kD	Protein phosphatase 1, regulatory subunit 13 like: regulator that plays a central role in regulation of apoptosis and transcription via its interaction with NF-kappa-B and p53/TP53 proteins.
Q2TTR0_HUMAN			2		1	81kD	CAPN1 (calpain 1): calcium regulated non-lysosomal thiol protease which catalyzes limited proteolysis of substrates involved in cytoskeletal remodelling and signal transduction
Q53Y61_HUMAN			5		1	69kD	DDX5 (DEAD/H box polypeptide 5): RNA dependent ATPase activity
Q96T67_HUMAN			4		1	65kD	TOB3: ATP binding
RARS			2		1	75kD	Arginyl-tRNA synthetase, cytoplasmic
SH3BP4			3		1	107kD	SH3 domain, binding protein 4
AKAP2	3				1	122kD	A kinase anchor protein 2: binds to the regulatory subunit of protein kinase A
CYFIP1	2				1	145kD	Cytoplasmic FMR1 interacting protein 1
DSG3	3				1	107kD	Desmoglein-3 precursor: component of intercellular desmosome junctions
EFTUD2	2				1	109kD	elongation factor Tu GTP binding domain containing 2: Component of the U5 snRNP complex required for pre-mRNA splicing. Binds GTP. Interacts with PRPF8
EGFR	2				1	134kD	Epidermal growth factor receptor precursor
ERP70	4				1	72kD	protein disulfide isomerase family A, member 4: catalyzes the rearragement of S-S bonds in proteins
FLII	3				1	144kD	Protein flightless-1 homolog: may play a role as coactivator in transcriptional activation by hormone-activated nuclear receptors and acts in cooperation with NCOA2 and CARM1. May play a role in regulation of cytoskeletal rearrangements involved in cytokinesis and cell migration.
GCS1	2				1	91kD	Mannosyl-oligosaccharide glucosidase: cleaves the distal alpha 1,2-linked glucose residue from the Glc(3)Man(9)GlcNAc(2) oligosaccharide precursor in a highly specific manner
gi|15149463|caldesmon_1,_isof	7				1	64kD	Caldesmon-1 isoform: encodes a calmodulin and actin binding protein that plays an essential role in the regulation of smooth muscle and non-muscle contraction.
gi|6573639|pdb|1QHA|A	5				1	102kD	HXK1: hexokinase-1
gi|9714270|double-stranded_RN	3				1	74kD	double-stranded RNA binding nuclear protein DRBP76 delta
GPIAP1	2				1	72kD	GPI-anchored membrane protein 1: may play a role in transporting nutrient from gut lumen across the gutlining epithelial cell layer
IARS	2				1	120kD	isoleucine-tRNA synthetase
IPI:IPI00339390.1|UniProt/Swiss-Prot:Q86UR5-2	2				1	115kD	splice isoform 2 of Q86UR5 regulating synaptic membrane exocytoss protein 1
IPI00411937	2				1	66kD	NOL5A (nucleolar protien 5A): required for 60S ribosomal subunit biogenesis
KIAA1967	3				1	102kD	DBC-1 (deleted in breast cancer gene 1 protein)
KTN1	4				1	156kD	Kinectin: receptor for kinesin thus involved in kinesin driven vesicle motility. Accumulates in integrin-based adhesion complexes upon integrin aggregation by fibronectin.
LARS	2				1	134kD	Leucyl-tRNA synthetase, cytoplasmic
LSS	2				1	83kD	Lanosterol synthase
MATR3	2				1	94kD	Matrin-3: may play a role in transcription or may interact with other nuclear matrix proteins to form the internal fibrogranular network. In association with the SFPQ-NONO heteromer, may play a role in nuclear retention of defective RNAs
MCM2	2				1	101kD	minichromosome maintenance deficient 2, mitotin: acts as a factor that allows the DNA to undergo a single round of replication per cell cycle. Required for entry in S phase and for cell division.
MTDH	4				1	63kD	metadherin: in epithelial cells, recruited to tight junctions during the maturation of the TJ complexes
MYO6	4				1	146kD	myosin VI: Recessive actin-based motor. Required for structural integrity of inner ear hair cells
PCK2	3				1	70kD	Phosphoenolpyruvate carboxykinase (GTP), mitochondrial precursor
PKP2	3				1	97kD	Plakophilin-2: may play a role in junctional plaques
PNPLA6	2				1	146kD	Patatin-like phospolipase domain containing 6
Q5JZ41_HUMAN	3				1	85kD	ACO2: aconitase
Q6ZRV2_HUMAN	2				1	94kD	unknown
SF3B3	2				1	135kD	Splicing factor 3B subunit 3 aka SAP130 (Sin3A-associated protein): Subunit of the splicing factor SF3B required for 'A' complex assembly formed by the stable binding of U2snRNP to the branchpoint sequence in pre-mRNA.
SND1	6				1	101kD	Staphylococcal nuclease domain containing 1: Functions as a bridging factor between STAT6 and the basal transcription factor. Plays a role in PIM1 regulation of MYB activity. Functions as a transcritpional coactivator of the Epstein-Barr virus nuclear antigen 2 (EBNA2)
SUPT16H	2				1	119kD	Supressor of Ty 16 homolog: Component of the FACT complex, a general chromatin factor that acts to reorganize nucleosomes. The FACT complex is probably also involved in phosphorylation of Ser 392 of P53 via its association with CK2
TFRC	2				1	84kD	Trasferrin receptor protein 1
TKT	2				1	67kD	Transketolase
UBE1	5				1	117kD	Ubiquitin activating enzyme E1:
DLG1				8	1	100kD	Disks large homolog 1: essential multidomain scaffolding protein required for normal development. May play a role in adherens junction assembly, signal transduction, cell proliferaton, synaptogenesis and lymphocyte activation
Q53XN2_HUMAN				2	1	97kD	KPNB1 (Karyopherin Importin beta 1): functions in nuclear import, either in association with an adapter protein or by acting as autonomous nuclear transport receptor.
Q5IBP1_HUMAN				2	1	118kD	SPEC1 (sperm antigen with calponin homology and coiled coil domains 1:
RP11-218D6.5				3	1	65kD	MPP7 (MAGUK p55 subfamily member)
UACA				2	1	162kD	Uveal autoantigen: regulates APAF1 expression and plays an important role in the regulation of stress-induced apoptosis. Promotes apoptosis by regulatin three pathways, apoptosome up-regulatio, LGALS3/galectin-3 downregulation and NF-kappaB inactivation.
UBE3A				14	1	100kD	Ubiquitin protein ligase E3A
IPI00006714			14		1	275kD	Splice isoform 3 of Tyrosine protein phosphatase, non-receptor type 13
MYH11			2		1	227kD	Myosin-11
CREBBP		4			1	265kD	CREB-binding protein: acetyltransferase enzyme. Acetylates histomes, giving a specific tag for transcriptional activation. Mediates cAMP gene regulation
PPL		3			1	204kD	Periplakin: Component of the cornified envelope of keratinocytes. May link the cornified envelope to desmosomes and intermediate filaments. May act as a localization signal in PKB/AKT-mediated signaling
ASCC3L1	3				1	244kD	U5 small nuclear ribonucleoprotein 200kDa helicase: Putative RNA helicase involved in the second step of RNA splicing
MYBBP1A	2				1	148kD	Myb-binding protein 1A: may activate or repress transcription via interactions with sequence specific DNA binding proteins. Repression may be mediated at least in part by histone deacetylase activity (HDAC activity)
FLNB				44	1	276kD	Filamin B, beta: connects cell membrane constituents to the actin cytoskeleton
IPI:IPI00410666.1|REFSEQ_NP:NP_874365|UniProt/TrEM				30	1	177kD	Scribble isoform a
SORL1				3	1	248kD	Sortilin-related receptor precursor: likely to be a multifunctional endocytic receptor, that may be implicated in the uptake of lipoproteins and of proteases
THBS1				2	1	129kD	Thrombospondin-1 precursor: adhesive glycoprotein that mediates cell to cell and cell to matrix interactions. Can bind to fibrinogen, fibronectin, laminin, type V collagen and integrins
UTRN				3	1	394kD	Utrophin: may play a role in anchoring the cytoskeleton to the plasma membrane
